# Supplementary material for: A review on research progress of double perovskite oxides for oxygen evolution reaction electrocatalysts and supercapacitors
Source: Royal Society of Chemistry journal article supplement (doi:10.1039/d4lf00395k), 2025-01-01
Supplement: d4lf00395k1.pdf [file d4lf00395k1.pdf]

Table S1 A comparison between the advantages and disadvantages of each synthesized method for double perovskite oxides

| Synthesized method                 | Advantages                                                                                                                                                                                              | Disadvantages                                                                                                                                                                                                       |
|------------------------------------|---------------------------------------------------------------------------------------------------------------------------------------------------------------------------------------------------------|---------------------------------------------------------------------------------------------------------------------------------------------------------------------------------------------------------------------|
| Solid-state reaction (SSR) method  | convenient, low-cost, and a potential for large scale production                                                                                                                                        | Unable to achieve uniform mixing at the atomic level, easy agglomeration, and unable to precisely control the composition of the material                                                                           |
| Molten salt synthesis (MSS) method | uniform particle size, well-defined crystal structure, controlled morphology and stoichiometry, low cost, high yield and quality, industrial production, universal applicability                        | The samples after low-temperature calcination must be cleaned with deionized water to remove excess salts, which can easily cause resource waste and increase costs                                                 |
| Combustion method                  | energy-saving and high reaction rates, simple equipment, low raw material costs, and the ability to achieve uniform mixing of reactants at the molecular level, easy to control the product composition | difficult to precisely control the combustion mode, and the controllability of the combustion process is poor. difficult to control the morphology of combustion products, unpredictable combustion characteristics |
| High-pressure (HP) synthesis       | tuning rapidly, shortening the synthesis time, simplifying procedures, large-scale production, one-step and intercepting high-pressure properties to ordinary pressure                                  | High equipment cost, high technical difficulty, and poor safety performance                                                                                                                                         |
| Sol-Gel method                     | good chemical uniformity, cost-effectiveness, fine particles, high purity, simple equipment, and high powder activity                                                                                   | long processing time, poor repeatability, and the consumption of a large amount of organic reagents, relatively high cost and not suitable for large-scale industrial production                                    |
| Hydrothermal method                | high purity and crystallinity, symmetrical particle distribution, controlled size and morphology                                                                                                        | high equipment cost, low reaction safety, and low output                                                                                                                                                            |
| Coprecipitation methods            | simpler process, lower reaction temperature, shorter reaction and aging time in production and the advantages of lower cost and higher profits concerning markets                                       | large particle size, wide distribution, poor morphology, and easy to produce coprecipitation of other impurities                                                                                                    |
| Electrostatic spinning             | a simple, convenient experimental setup. large-scale and efficient preparation of perovskite inorganic nanofibers with high aspect ratios                                                               | High voltage required, high energy consumption, difficult to collect liquids, supercritical fluid as a plasticizer required                                                                                         |
